# Supplementary material for: Flying upconversion fluorescent particles and direct observation of energy transfer and depopulation processes
Source: Royal Society of Chemistry journal article supplement (doi:10.1039/c4ce01733a), 2014-11-06
Supplement: c4ce01733a1.pdf [file c4ce01733a1.pdf]

Supporting Information

# Flying Upconversion Fluorescent Particles and Direct Observation of Energy transfer and Depopulation Processes

Kezhi Zheng, Weiping Qin\*, Guanshi Qin, Dan Zhao, and Changfeng Wu

*State Key Laboratory on Integrated Optoelectronics, College of Electronic Science and Engineering, Jilin University, Changchun 130012, China*

\* Corresponding author: [wpqin@jlu.edu.cn](mailto:wpqin@jlu.edu.cn)

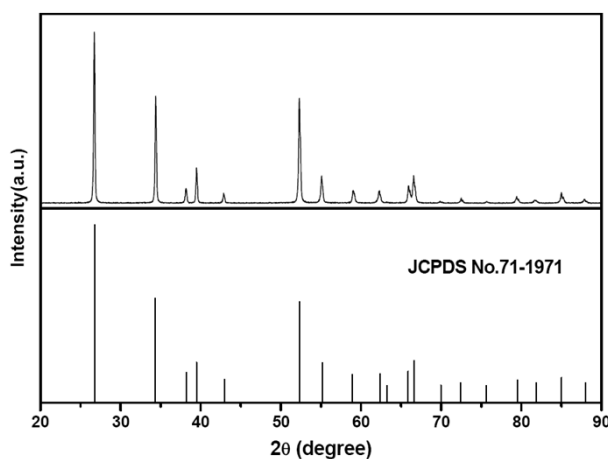

**FIG. S1.** X-ray diffraction pattern of ZnF<sub>2</sub>:Yb<sup>3+</sup>, Tm<sup>3+</sup> target. The standard datum for ZnF<sub>2</sub> (JCPDS No.12-0797) is also presented in the figure for comparison.

Fig. S1 shows the XRD pattern of ZnF<sub>2</sub>:Yb<sup>3+</sup>/Tm<sup>3+</sup> target. It is clear that all the diffraction peaks can be well indexed to tetragonal phase ZnF<sub>2</sub> (JCPDS No.71-1971). In addition, no other impurity peaks can be detected from the XRD pattern, indicating that the samples is single-phased and RE<sup>3+</sup> ions have effectively incorporated into the ZnF<sub>2</sub> host lattices.
